# Supplementary material
Source: Atypon-hosted journal article supplement (https://catalog.dmpl.org/Record/367523/DownloadSupplementalFile?fileId=30)
Supplement: DownloadSupplementalFile [file DownloadSupplementalFile]

# S.T.E.M. Activity: Magna-Tiles : The Monster at the End of This Story, Ages 3-6

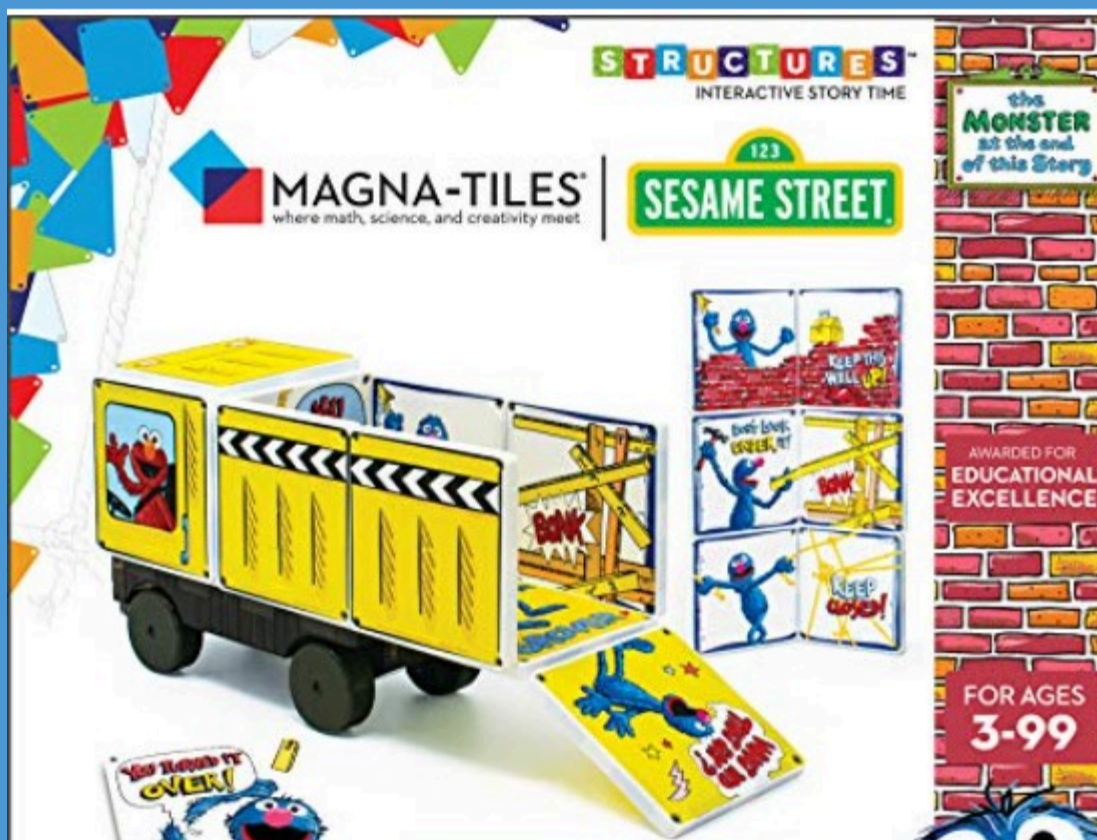

## Related Reading

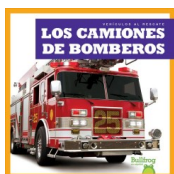

### Los camiones de bomberos/ Fire Trucks

by Bizzy Harris

In Fire Trucks, beginning readers will learn about how fire trucks help stop fires. Vibrant, full-color photos and carefully leveled text will engage young readers as they are introduced to the features that are unique to this rescue machine.

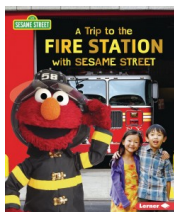

### A trip to the fire station with Sesame Street

by Christy Peterson

Kids can tag along to the fire station with firefighter Elmo and other Sesame Street friends! They'll learn about firefighters' gear, fire trucks, and how to make a fire safety plan with their families.

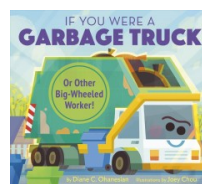

### If You Were a Garbage Truck or Other Big-wheeled Worker!

by Diane Ohanesian

This rollicking, rhyming picture book puts preschoolers in the drivers seat, inviting them to rev it up to see the ups and downs of being a busy truck!

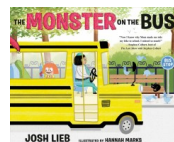

### The monster on the bus

by Josh Lieb

Cassius and Angelique are riding the bus on the first day of school, but in order to make it to school on time, they must outsmart a wild cast of characters.

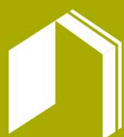

DES MOINES  
PUBLIC LIBRARY

dmpl.org | 515.283.4152
